# Supplementary material for: Standard dilution analysis (SDA) as a powerful tool for elemental determination in biodiesel by inductively coupled plasma optical emission spectrometry (ICP OES)
Source: Royal Society of Chemistry journal article supplement (doi:10.1039/d3ja00192j), 2023-01-01
Supplement: d3ja00192j1.pdf [file d3ja00192j1.pdf]

## Supplementary Data

### Figures

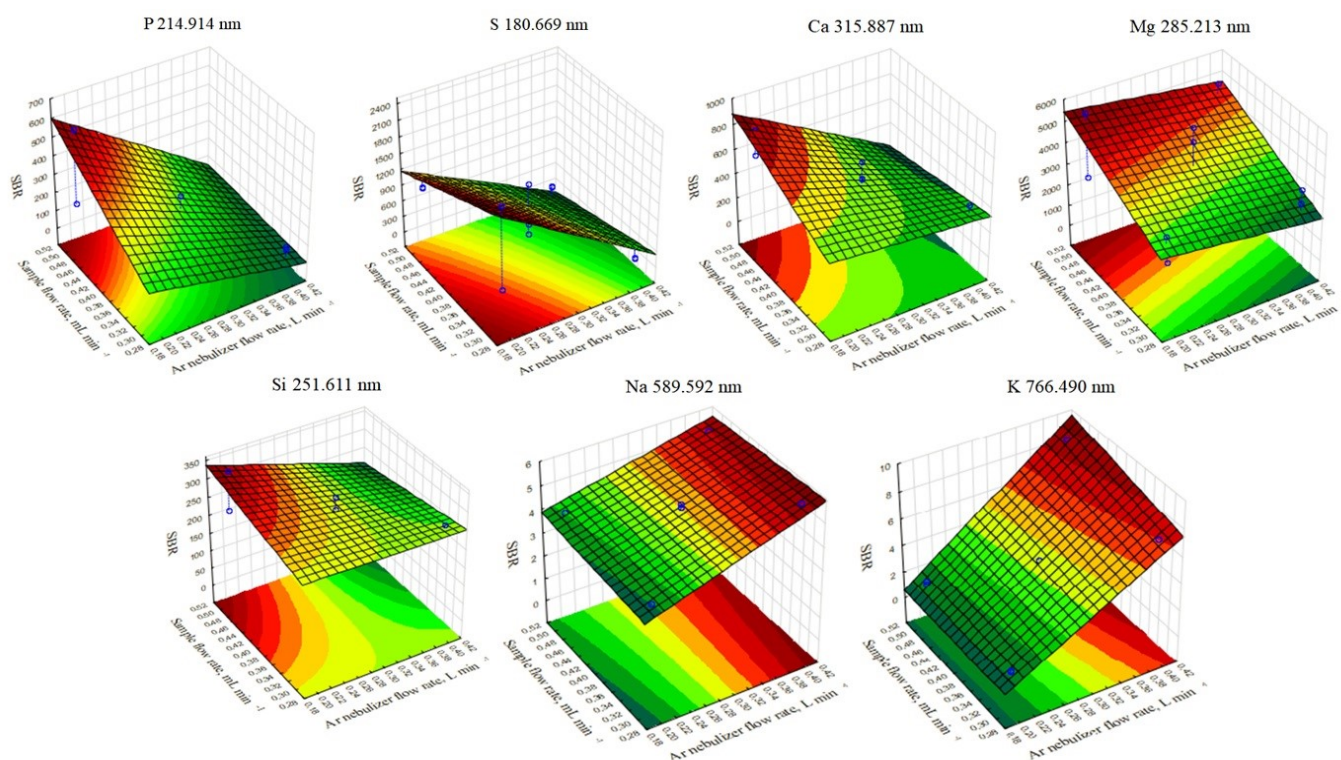

Figure S1 - Response surfaces for the analytes' SBR over the sample and Ar nebulizer flow rates, obtained by 2-level full factorial design with replication at the center point, for the spectral lines: P 214.914 nm, S 180.669 nm, Ca 315.887 nm, Mg 285.213 nm, Si 251.611 nm, Na 589.592 nm, and K 766.490 nm.

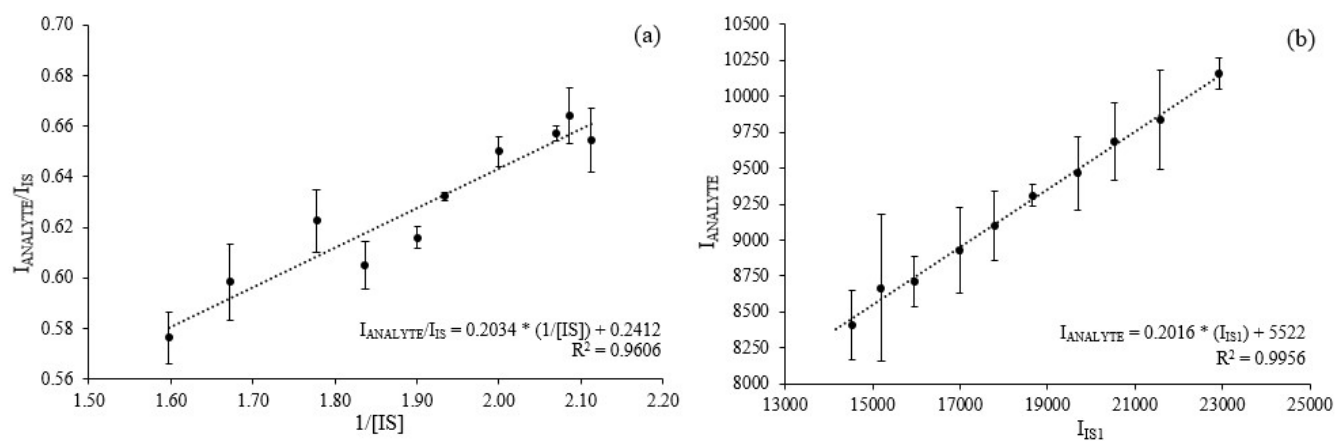

Figure S2 - Analytical curves obtained by SDA method with one (a) and two (b) internal standards for determination of Ca, at 315.887 nm, in biodiesel sample ( $n = 3$ ).

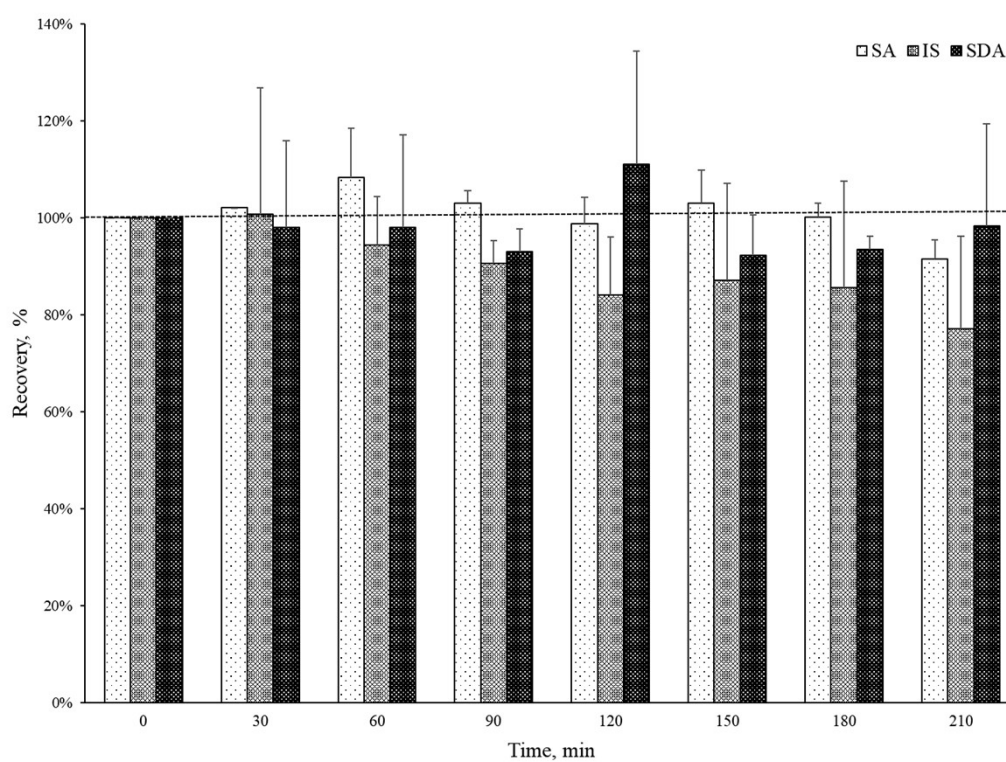

Figure S3 - Analytical frequency test for S in biodiesel sample applying IS, SA and SDA calibration methods ( $n = 3$ ).

## Tables

Table S1 - Selected wavelengths and view mode for Na, K, Ca, Mg, P, Si, and S determination in biodiesel samples by ICP OES

| Element | Wavelengths ( $\lambda$ , nm) | View mode |
|---------|-------------------------------|-----------|
| Na      | 589.592 (I)                   | Radial    |
| K       | 766.490 (I)                   | Radial    |
| Ca      | 315.887 (II)                  | Radial    |
| Mg      | 285.213 (I)                   | Radial    |
| P       | 214.914 (I)                   | Axial     |
| Si      | 251.611 (I)                   | Axial     |
| S       | 180.669 (I)                   | Axial     |

(I): Atomic line (II): Ionic line

Table S2 - Experimental matrix used for the 2-level full factorial design ( $2^3$ ) with replication at the center point

| Parameters                                  | Levels |      |      |
|---------------------------------------------|--------|------|------|
|                                             | -      | 0    | +    |
| Ar nebulizer flow rate, L min <sup>-1</sup> | 0.2    | 0.3  | 0.4  |
| Sample flow rate, mL min <sup>-1</sup>      | 0.3    | 0.4  | 0.5  |
| Radiofrequency (RF) power, W                | 1300   | 1400 | 1500 |
